# Supplementary material for: N,S co-doped V3Nb17O50@C fibers used for lithium-ion storage
Source: Royal Society of Chemistry journal article supplement (doi:10.1039/d2cc00530a), 2022-01-01
Supplement: d2cc00530a1.pdf [file d2cc00530a1.pdf]

**Supporting Information:**

**N, S co-doped  $V_3Nb_{17}O_{50}@C$  fibers used for lithium- ion storage**

Hongliang Fu <sup>a</sup>, Qi Duan <sup>a</sup>, Yue Lian <sup>a</sup>, Dawei Wang <sup>a</sup>, Yongqing Bai <sup>a</sup>, Zonglun Cao  
<sup>b</sup>, Jie Sun <sup>b</sup>, Jing Zhao <sup>a</sup>, Huaihao Zhang <sup>a,\*</sup>

<sup>a</sup> School of Chemistry & Chemical Engineering, Yangzhou University, Yangzhou  
225002, PR China

<sup>b</sup> SINOPEC Beijing Research Institute of Chemical Industry, Beijing 100013, PR  
China

## Experimental section

### Synthesis of $V_3Nb_{17}O_{50}$ precursor

$NH_4VO_3$  (1.5 mmol, 99%) and  $NbCl_5$  (8.5 mmol, 99.9%) were dissolved in 60 mL isopropyl alcohol successively and stirred at room temperature for 4 h to form a homogeneous solution. The obtained solution was transferred into a Teflon-lined autoclave (100 mL) and kept at 200 °C for 24 h. After cooling down naturally, the precipitate was collected by centrifugation, washed with deionized water and ethanol individually, and dried at 80 °C for 12 h in a vacuum oven.

### Synthesis of $V_3Nb_{17}O_{50}@NC$ and S- $V_3Nb_{17}O_{50}@NC$

$V_3Nb_{17}O_{50}$  precursor (0.6g), PAN (0.2 g, Mw = 15000), and DMF (2 mL) were added to a beaker, and stirred in a 60 °C water bath for 10 h to acquire the precursor solution. Then, the precursor solution was transferred to a syringe with a 21 G needle (inner diameter = 0.5 mm), and spun into nanofibers under such condition: a voltage of 16 kV, a speed of 0.1 mL h<sup>-1</sup>, and a distance of 15 cm between the needle and the plate. The spun fibers were cured at 200 °C for 2 h, then kept at 800 °C for 2 h in a tubular furnace in N<sub>2</sub> atmosphere at a heating rate of 2 °C min<sup>-1</sup>, thus to obtain  $V_3Nb_{17}O_{50}@NC$  (the contrast sample). After that,  $V_3Nb_{17}O_{50}@NC$  mixed with sublimated sulfur in a mass ratio of 1:5 were placed in the tubular furnace, and hold at 500 °C for 2 h at a heating rate of 2 °C min<sup>-1</sup> under N<sub>2</sub> atmosphere to acquire S- $V_3Nb_{17}O_{50}@NC$ .

### Material characterization

The composition and purity of the obtained samples were characterized by X-ray powder diffraction (XRD, Bruker, D8 super speed, Germany) with Cu K $\alpha$  radiation ( $\lambda = 1.5406 \text{ \AA}$ ). The Raman spectra of products were recorded using a Raman spectrometer (Renishaw Invia) at 532 nm laser wavelength. The morphology and microstructure were observed by scanning electron microscopy (FESEM, Hitachi, S-4800 II, Japan) and transmission electron microscopy (TEM, Philips, TECNAI 12, Holland). The lattice parameters of samples were determined by high-resolution transmission electron microscopy (HRTEM, Tecnai, G2F30 S-TWIN, USA) equipped with an energy dispersive X-ray spectrometer (EDS). Surface analysis of samples were carried out by X-ray photoelectron spectroscopy (XPS, Thermo Science, ESCALAB

250Xi, USA). The carbon content of the samples was available by thermogravimetric analysis (Pyris 1 TGA, PerkinElmer) from room temperature to 800 °C at a rate of 5 °C min<sup>-1</sup> in the air atmosphere.

### **Electrochemical measurements**

Electrochemical tests were attainable on V<sub>3</sub>Nb<sub>17</sub>O<sub>50</sub>@NC and S-V<sub>3</sub>Nb<sub>17</sub>O<sub>50</sub>@NC electrodes using half-cell and full-cell. V<sub>3</sub>Nb<sub>17</sub>O<sub>50</sub>@NC/S-V<sub>3</sub>Nb<sub>17</sub>O<sub>50</sub>@NC (the active material, 80 wt%), acetylene black (the conductive agent, 10 wt%), and polyvinylidene fluoride (PVDF, the binder, 10 wt%) were homogeneously mixed in N-methyl-2-pyrrolidone (NMP). The resulting slurries were coated on Cu foil, dried overnight at 80 °C, and then roll-pressed (with ~ 1 mg cm<sup>-2</sup> mass loading of the active material). The half-cell tests were carried out using 2032-type coin cells with Li metal as anode, S-V<sub>3</sub>Nb<sub>17</sub>O<sub>50</sub>@NC as cathode, 1.0 M LiPF<sub>6</sub> in ethylene carbonate/dimethyl carbonate (EC/DMC, 1:1) as electrolyte, and polypropylene membrane (Celgard 2400) as separator. All coin cell assembly steps were operated in an Ar-filled glove box. For LIC, the activated carbon (AC) cathode was prepared using Al foil as current collector in the same way as mentioned above. S-V<sub>3</sub>Nb<sub>17</sub>O<sub>50</sub>@NC was employed as anode and activated carbon as cathode. The mass ratio of cathode to anode was controlled at about 3.6:1 in the voltage range of 0.5–3.0 V. The galvanostatic charge/discharge (GCD) performances of LIB and LIC were available on a Neware Battery Tester. Cyclic voltammetry (CV) measurements were acquired on a CHI 660E electrochemical workstation.

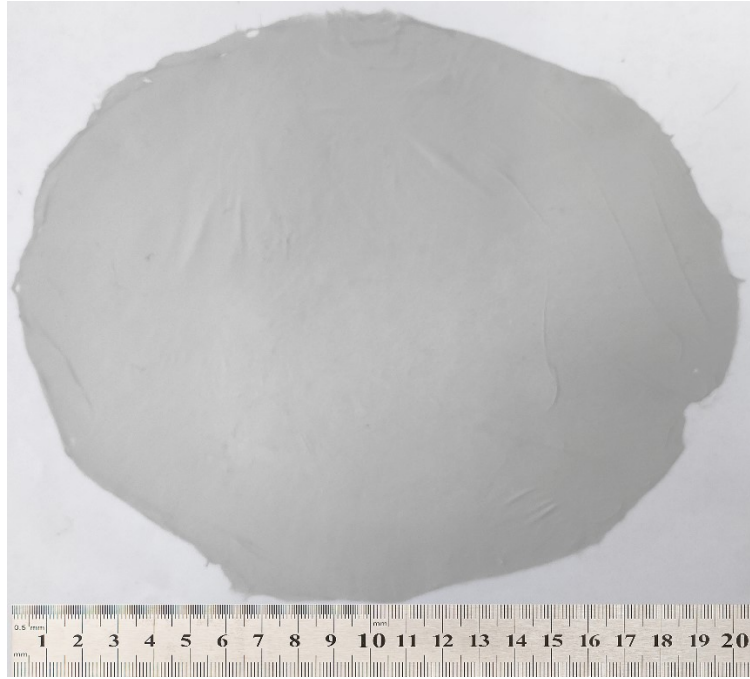

Fig. S1. Digital photo of V<sub>3</sub>Nb<sub>17</sub>O<sub>50</sub>@PAN precursor after electrospinning.

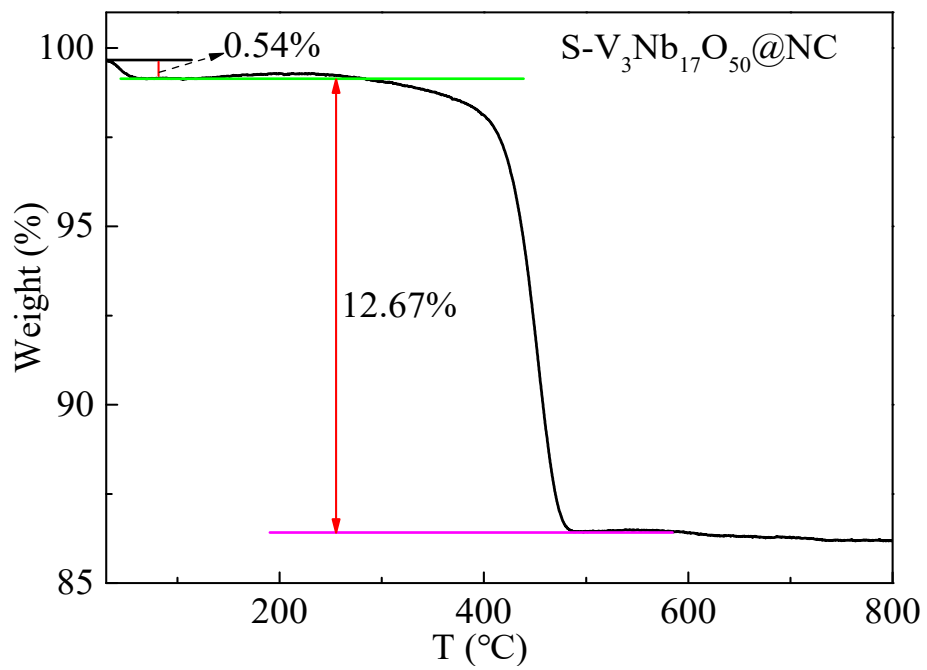

Fig. S2. TGA curve of S-V<sub>3</sub>Nb<sub>17</sub>O<sub>50</sub>@NC.

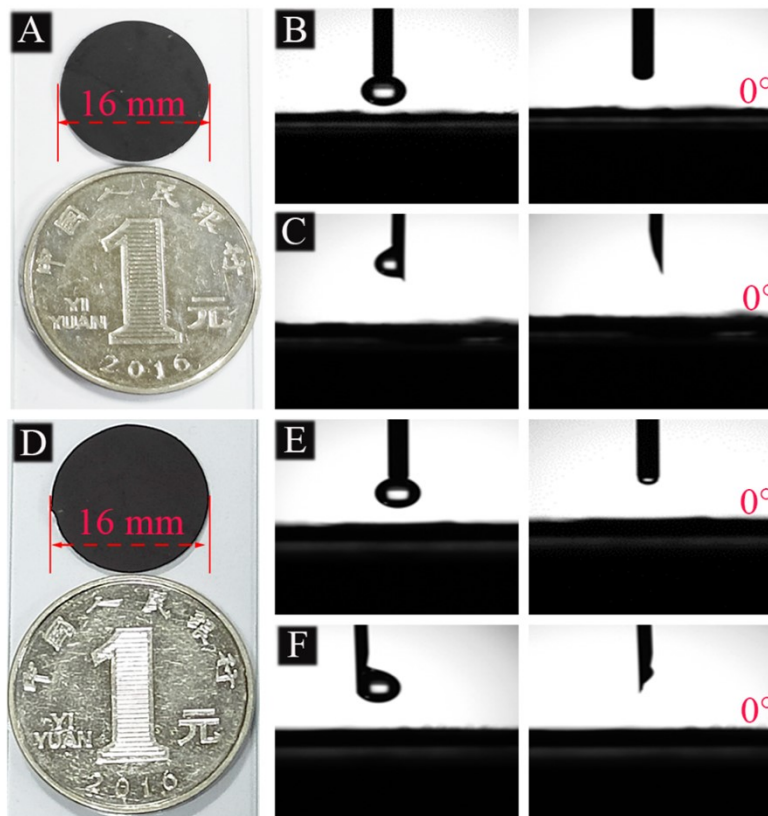

Fig. S3.  $V_3Nb_{17}O_{50}@NC$  nanofibers plate (A); Contact angle of  $V_3Nb_{17}O_{50}@NC$  with water (B) and DMC (C);  $S-V_3Nb_{17}O_{50}@NC$  nanofibers plate (D); Contact angle of  $S-V_3Nb_{17}O_{50}@NC$  with water (E) and DMC (F).

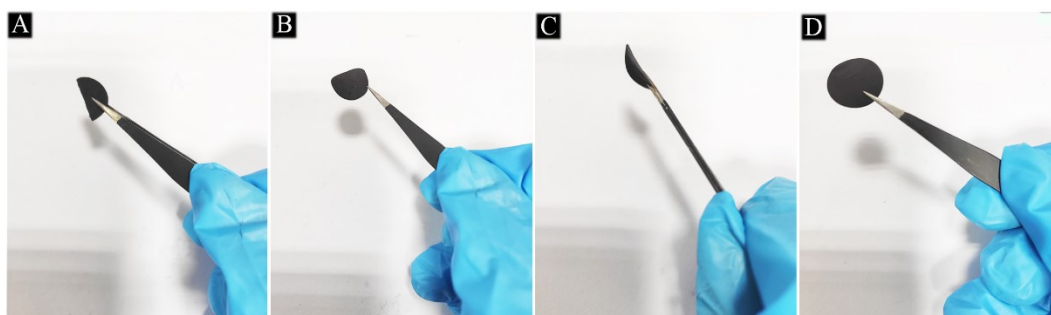

Fig. S4. (A~D) Bending test of  $S-V_3Nb_{17}O_{50}@NC$  nanofibers.

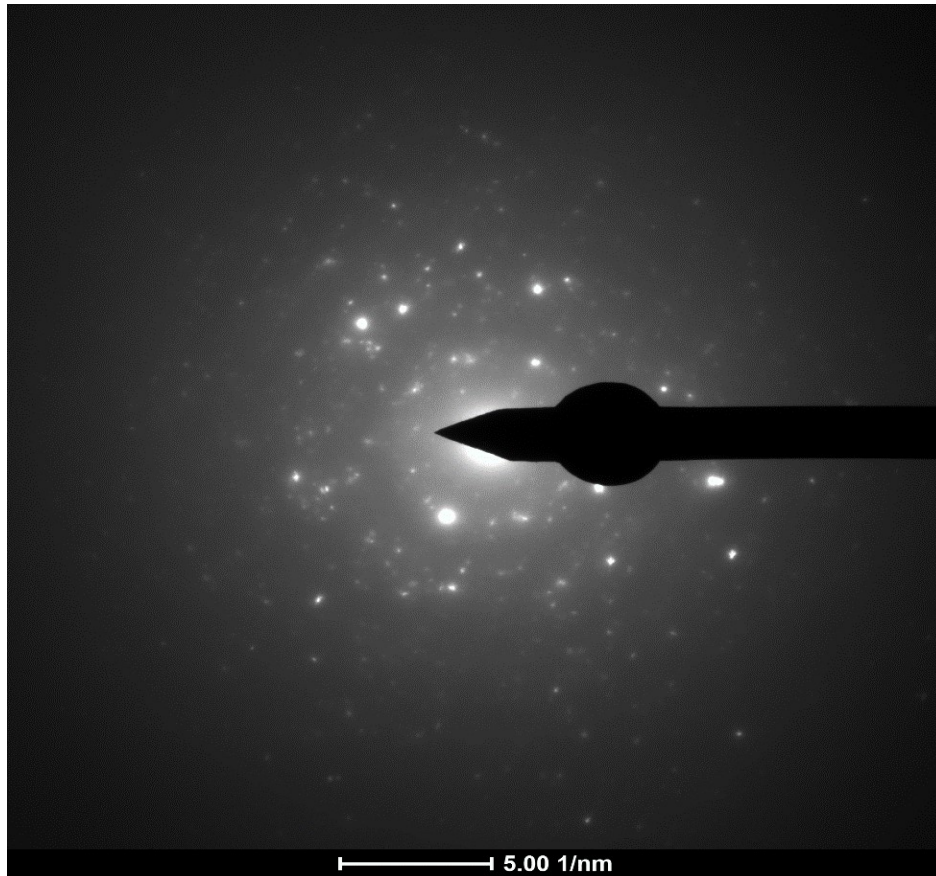

Fig. S5. SAED pattern of S-V<sub>3</sub>Nb<sub>17</sub>O<sub>50</sub>@NC.

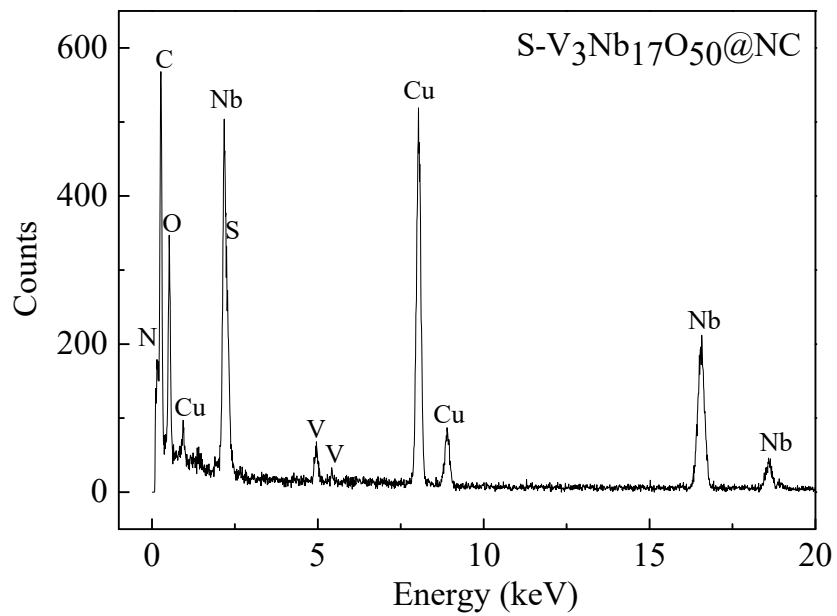

Fig. S6. EDS of S-V<sub>3</sub>Nb<sub>17</sub>O<sub>50</sub>@NC. (Copper element from the TEM matrix.)

Table. S1. Quantification results of S-V<sub>3</sub>Nb<sub>17</sub>O<sub>50</sub>@NC

| Element | Weight (%) | Atomic (%) | Uncertainly (%) | Detector Correction | K-Factor |
|---------|------------|------------|-----------------|---------------------|----------|
| C       | 37.29      | 69.43      | 0.63            | 0.26                | 4.032    |
| N       | 1.71       | 2.73       | 0.16            | 0.26                | 3.903    |
| O       | 10.07      | 14.08      | 0.26            | 0.49                | 2.008    |
| S       | 2.47       | 1.72       | 0.13            | 0.93                | 1.015    |
| V       | 1.83       | 0.80       | 0.07            | 0.99                | 1.257    |
| Nb      | 46.6       | 11.21      | 0.61            | 0.99                | 3.705    |

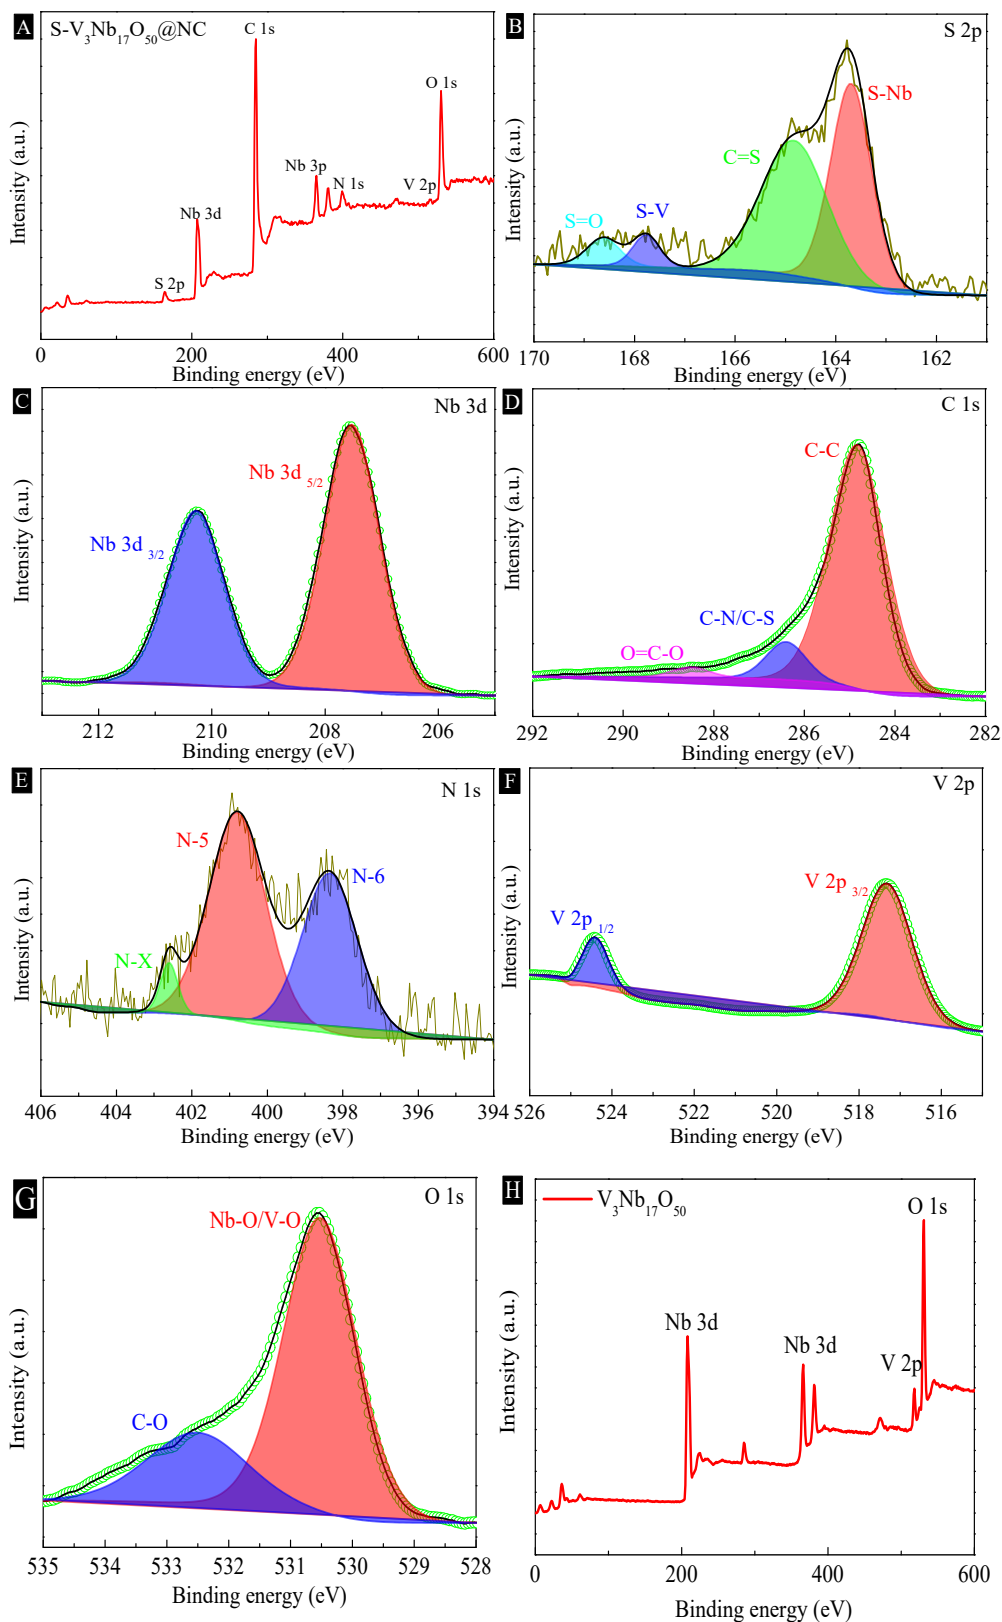

Fig. S7. XPS spectra of S- $V_3Nb_{17}O_{50}@NC$ : (A) Scanning spectrum; (B) S 2p; (C) Nb 3d; (D) C 1s; (E) N 1s; (F) V 2p and (G) O 1s. Scanning spectrum of  $V_3Nb_{17}O_{50}$  (H).



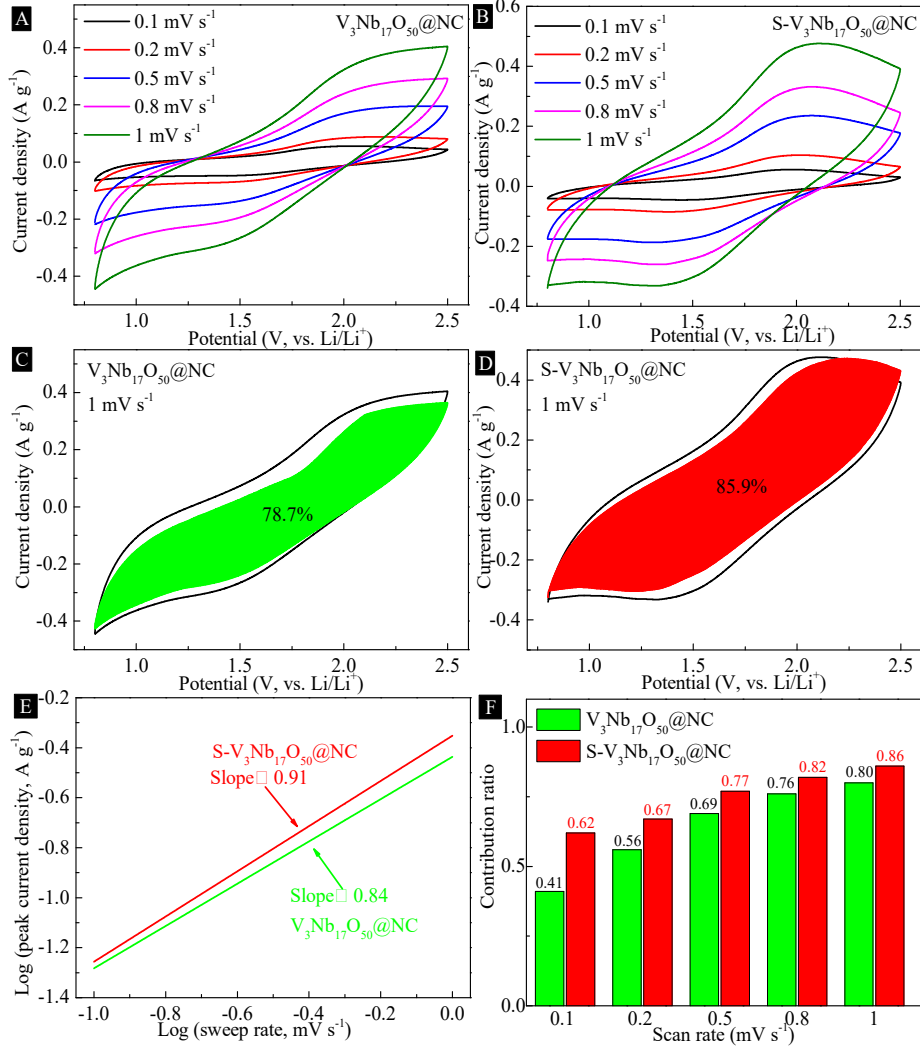

Fig. S8. CV curves of  $V_3Nb_{17}O_{50}@NC$  (A) and  $S-V_3Nb_{17}O_{50}@NC$  (B) at scanning rates from 0.1 to 1  $mV s^{-1}$ ; Total current (solid line) and capacitive current (shaded part) of  $V_3Nb_{17}O_{50}@NC$  (C) and  $S-V_3Nb_{17}O_{50}@NC$  (D) at 1  $mV s^{-1}$ ; (E) Relationship between scanning rate and peak current density to calculate  $b$  value; (F) Contribution ratio of capacitance and diffusion control processes at various scanning rates.

The dynamic behavior of the sample is studied by the relationship between current ( $i$ ) and scan rate ( $v$ ):

$$i = av^b \quad (1)$$

To gain  $b$  value, the formula (1) is converted (1) into (2):

$$\log(i) = b\log(v) + \log(a) \quad (2)$$

where  $a$  and  $b$  are adjustable parameters. The  $b$  value, the key parameter to distinguish capacitive-controlled behavior and diffusion-controlled behavior, can be obtained from a linear relationship between  $\log(i)$  and  $\log(v)$ . Specifically,  $b \approx 1$  demonstrates the dominance of capacitive controlled process, while  $b \approx 0.5$  shows the ruling diffusion-

controlled process. The  $b$  values of  $V_3Nb_{17}O_{50}@NC$  and  $S-V_3Nb_{17}O_{50}@NC$  (Fig. S8E) are 0.84 and 0.91 individually, proving the higher capacitance contribution of the latter (Fig. S8F). Obviously, the defects from N, S co-doping widen the  $Li^+$  transmission channel and boost the ion/electron transmission rate. To further quantify the capacitance contribution ratio, the total current can be divided into capacitive current ( $k_1 v$ ) and diffusion current ( $k_2 v^{1/2}$ ) as follows:

$$i = k_1 v + k_2 v^{1/2} \quad (3)$$

where  $k_1$  and  $k_2$  represent the ratio of capacitive control and diffusive control at fixed potentials. At the current density of  $1 \text{ mV s}^{-1}$ , the capacitance contribution ratio of  $V_3Nb_{17}O_{50}@NC$  and  $S-V_3Nb_{17}O_{50}@NC$  are 78.7% (Fig. S8C) and 85.9% (Fig. S8D) respectively, illustrating the larger capacitance reactivity of  $S-V_3Nb_{17}O_{50}@NC$ . With the rise of the scan rate, the capacitance contribution ratio of the electrode materials gradually increases (Fig. S8F). From the CV curve (integrated area) and capacitance contribution ratio, the  $S-V_3Nb_{17}O_{50}@NC$  electrode supplies superior electrochemical performance. Accordingly, the N, S co-doping is helpful to expand lattice channels, provide more reactive sites, and accelerate the lithium-ion transport dynamics.

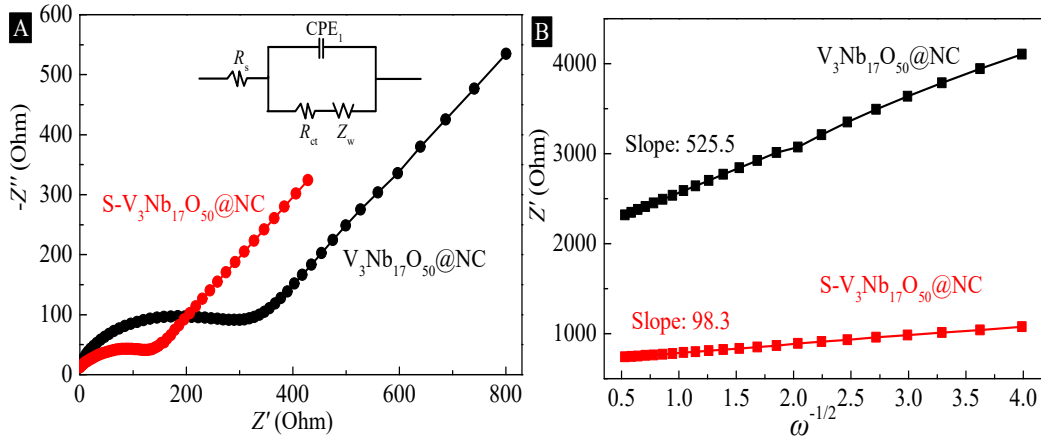

Fig. S9. (A) Impedance spectra of  $V_3Nb_{17}O_{50}@NC$  and  $S-V_3Nb_{17}O_{50}@NC$  electrode; (B) Warburg impedance coefficient ( $\sigma$ ) from the linear fitting line of  $Z'$  versus  $\omega^{-1/2}$ .

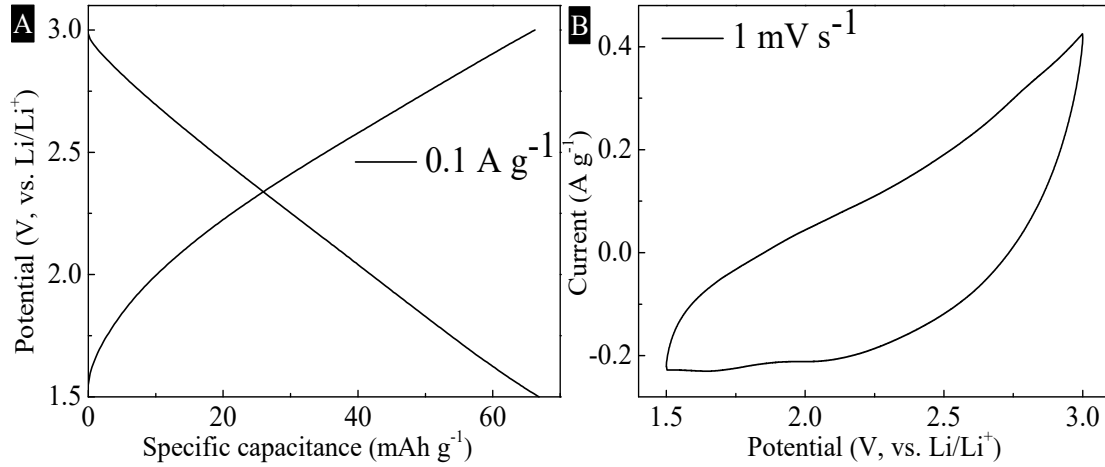

Fig. S10. GCD curves (A) and CV curves (B) of AC//Li.

The energy density and power density of S-V<sub>3</sub>Nb<sub>17</sub>O<sub>50</sub>@NC//AC were achieved by the following formulas:

$$C = \frac{I \times t}{(V_{\max} - V_{\min}) \times m} \quad (1)$$

$$E = \int_{t_1}^{t_2} IV dt = \frac{1}{2} C (V_{\max} + V_{\min}) (V_{\max} - V_{\min}) = \frac{V_{\max} + V_{\min}}{2} \times \frac{I \times t}{m} \times \frac{1}{3.6} \quad (2)$$

$$P = \frac{3600 \times E}{t} \quad (3)$$

where  $V_{\max}$  (3.0 V) and  $V_{\min}$  (0.5 V) are the initial and final discharge potentials (V),  $I$  is the discharge current (A),  $t$  is the discharge time (s),  $m$  is the total mass of the active materials in both anode and cathode (g),  $C$  is the specific capacitance (F g<sup>-1</sup>),  $E$  is the energy density (Wh kg<sup>-1</sup>), and  $P$  is the power density (W kg<sup>-1</sup>).

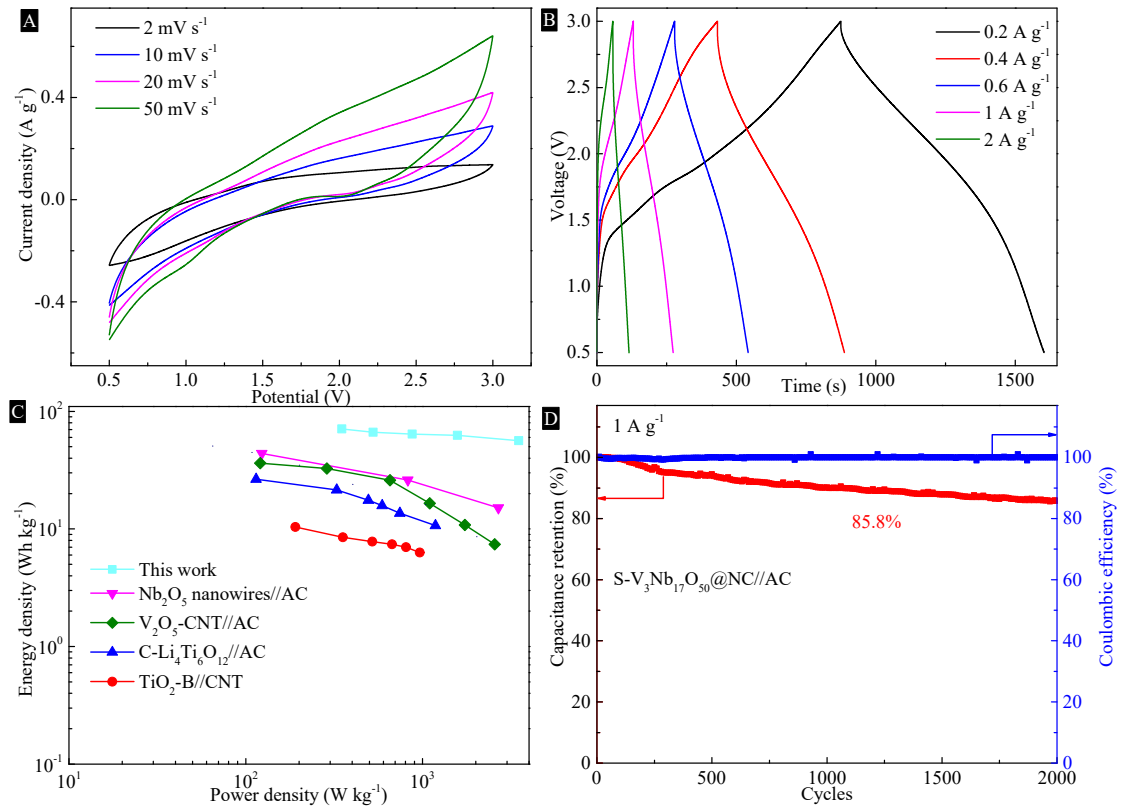

Fig. S11. CV curves (A); GCD curves (B); Ragone plots (C); (D) Cycling performance and Coulombic efficiency at 1 A g<sup>-1</sup>.

The diffusion coefficient of lithium-ion ( $D_{Li}$ ) can be further calculated from the low-frequency region according to the following formula:

$$D_{Li} = \frac{(RT)^2}{2A^2 n^4 F^4 C_{Li}^2 \sigma^2} \quad (4)$$

$$Z' = R_{ct} + R_s + \sigma \omega^{-1/2} \quad (5)$$

where  $R$  is the gas constant,  $T$  is the absolute temperature (K),  $A$  is the surface area of the electrode (cm<sup>2</sup>),  $n$  is the electrons number per molecule in the intercalation

process,  $F$  is the Faraday constant,  $C_{\text{Li}}$  is the  $\text{Li}^+$  molar concentration in electrode ( $\text{mol L}^{-1}$ ),  $\omega$  is the angular frequency, and  $\sigma$  is the Warburg factor related with  $Z'$ . In addition, the  $\sigma$  can be obtained by linearly fitting  $Z'$  with  $\omega^{-1/2}$ .  $D_{\text{Li}}$  is acquired by substituting different values of  $\sigma$  (Fig. S9B) into equation (4). From the calculation results, the  $D_{\text{Li}}$  of S- $\text{V}_3\text{Nb}_{17}\text{O}_{50}@NC$  ( $1.16 \times 10^{-7} \text{ cm}^2 \text{ s}^{-1}$ ) is larger than that of  $\text{V}_3\text{Nb}_{17}\text{O}_{50}@NC$  ( $2.18 \times 10^{-8} \text{ cm}^2 \text{ s}^{-1}$ ), which proves that N, S co-doping endows S- $\text{V}_3\text{Nb}_{17}\text{O}_{50}@NC$  with good conductivity and ion mobility.

Based on the good electrochemical performance of S- $\text{V}_3\text{Nb}_{17}\text{O}_{50}@NC$  with lithium foil electrode in half battery, its application in lithium-ion hybrid capacitor (LIC) was further studied. Herein, the assembled LIC as an energy storage device combine  $\text{Li}^+$ -intercalation Faraday reaction (S- $\text{V}_3\text{Nb}_{17}\text{O}_{50}@NC$ ) with ion adsorption/desorption non-Faraday reaction (AC). To maximize the energy storage capacity, the working voltage range and the mass ratio of S- $\text{V}_3\text{Nb}_{17}\text{O}_{50}@NC$  anode to AC cathode need to be optimized. According to the specific capacity at the same current density, the optimum mass ratio of two electrodes was calculated to be 1:3.6 using the charge conservation law ( $C_+ \times E_+ \times m_+ = C_- \times E_- \times m_-$ ). The voltage range was carefully determined to be 0.5 V to 3 V. The electrochemical performance of AC electrode was also tested in a half-cell with AC as cathode and Li as anode. As for CV curve, the AC electrode at a scan rate of  $1 \text{ mV s}^{-1}$  (Fig. S10B) shows the typical characteristics of double-layer capacitance, along with highly symmetric triangles (vs.  $\text{Li}/\text{Li}^+$ ) in the GCD curve (Fig. S10A). The CV (Fig. S11A) and GCD (Fig. S11B) curves of the LIC (S- $\text{V}_3\text{Nb}_{17}\text{O}_{50}@NC//AC$ ) do not appear typically rectangular and triangular, owing to the coupling of pseudo-capacitive intercalation and surface adsorption behavior. During the discharge process,  $\text{Li}^+$  is de-embedded from S- $\text{V}_3\text{Nb}_{17}\text{O}_{50}@NC$ , accompanied by the  $\text{PF}_6^-$  desorption from AC surface. While for the charge process, the reaction is reversed. S- $\text{V}_3\text{Nb}_{17}\text{O}_{50}@NC//AC$  (Fig. S11D), retaining a specific capacitance of 85.8% after 2000 cycles at a current density of  $1 \text{ A g}^{-1}$ , with nearly 100% Coulombic efficiency, demonstrate good cycling stability.

The crystal plane spacing of  $V_3Nb_{17}O_{50}$  and  $V_3Nb_{17}O_{50}$ @NC was analyzed by HRTEM (Fig. S12). The crystal plane spacing of  $V_3Nb_{17}O_{50}$  (Fig. S12A),  $V_3Nb_{17}O_{50}$ @NC (Fig. S12B), S- $V_3Nb_{17}O_{50}$ @NC (Fig. 2H) are 0.316 nm, 0.348 nm, 0.367 nm, respectively, indicating that the crystal plane spacing of  $V_3Nb_{17}O_{50}$  is widened after N and S doping.

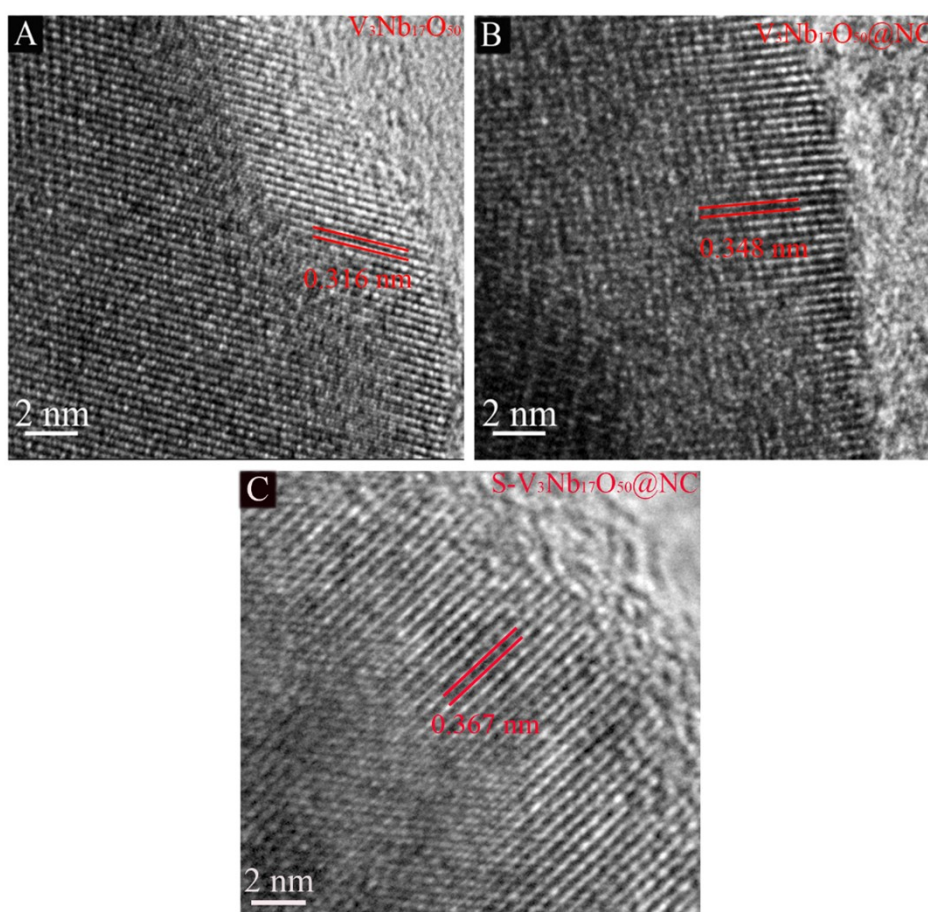

Fig. 12. HRTEM images of  $V_3Nb_{17}O_{50}$  (A),  $V_3Nb_{17}O_{50}$ @NC (B), and S- $V_3Nb_{17}O_{50}$ @NC (C).

The specific surface area and pore size distribution of S- $V_3Nb_{17}O_{50}@NC$  were analyzed by  $N_2$  adsorption analyzer (BET). From BET information, a large  $S_{BET}$  ( $78.4 \text{ m}^2 \text{ g}^{-1}$ ) and a good mesoporous size distribution (centred at 10 nm) of S- $V_3Nb_{17}O_{50}@NC$  (Fig. S13) are achieved, which is helpful to accelerate  $Li^+$  diffusion and provide more electroactive sites.

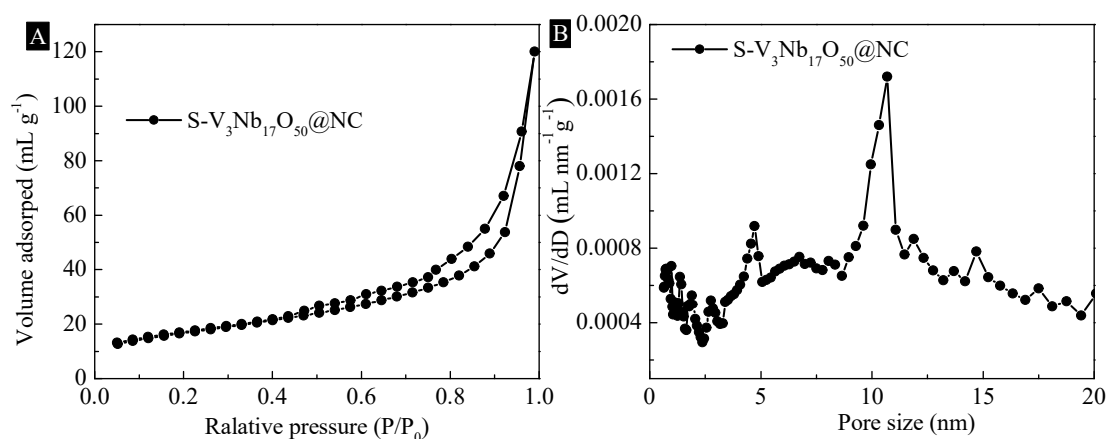

Fig. S13. BET adsorption isotherms (A) and pore size distribution (B) of S- $V_3Nb_{17}O_{50}@NC$ .

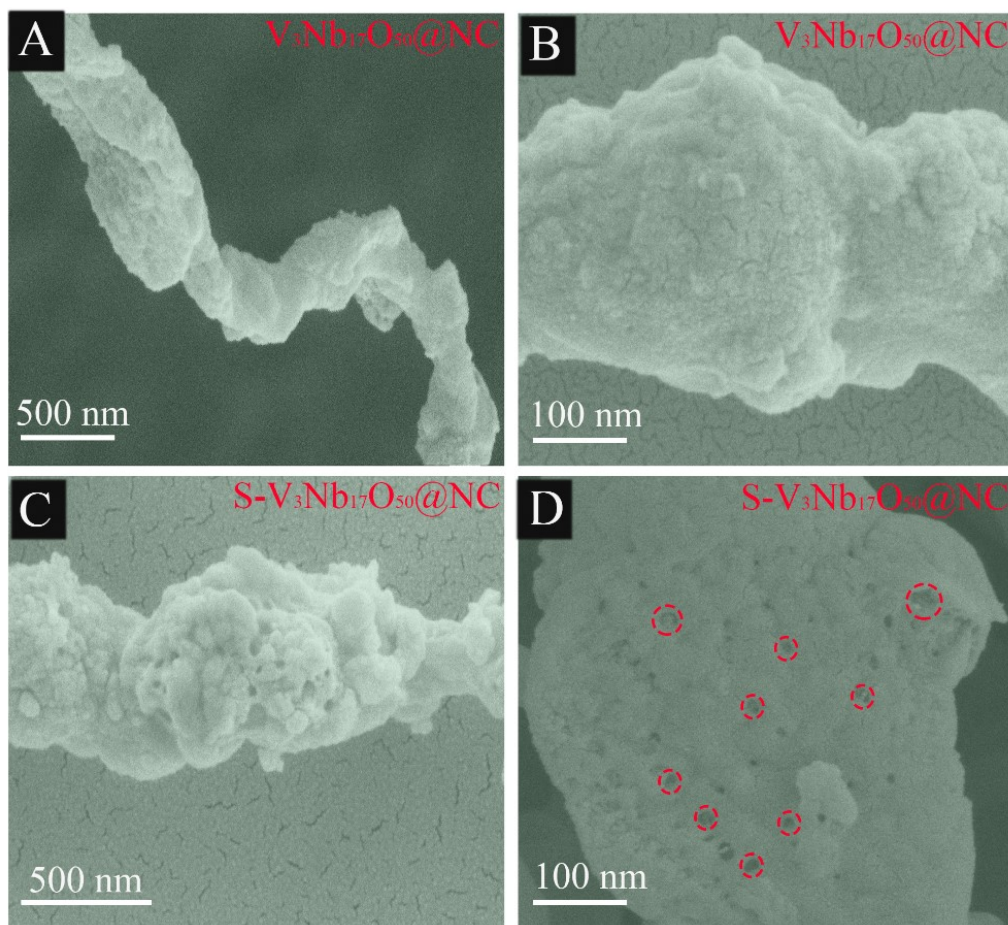

Fig. S14. SEM of  $V_3Nb_{17}O_{50}@NC$  (A and B) and  $S-V_3Nb_{17}O_{50}@NC$  (C and D).

The GCD curves of  $V_3Nb_{17}O_{50}$ ,  $V_3Nb_{17}O_{50}@NC$ , and  $S-V_3Nb_{17}O_{50}@NC$  (Fig. S15) were tested at  $0.1 \text{ A g}^{-1}$  current density. Specifically, the  $V_3Nb_{17}O_{50}$ ,  $V_3Nb_{17}O_{50}@NC$ , and  $S-V_3Nb_{17}O_{50}@NC$  display reversible capacity of  $163.4 \text{ mAh g}^{-1}$ ,  $186.4 \text{ mAh g}^{-1}$ , and  $221.2 \text{ mAh g}^{-1}$ , respectively. Compared with  $V_3Nb_{17}O_{50}$ ,  $V_3Nb_{17}O_{50}@NC$  increases by  $23 \text{ mAh g}^{-1}$ , while  $S-V_3Nb_{17}O_{50}@NC$  rising  $58.7 \text{ mAh g}^{-1}$ , indicating sulfur vapor etching produces advanced porous structure and large specific surface area of  $S-V_3Nb_{17}O_{50}@NC$ , which is conducive to  $Li^+$  transport dynamics.



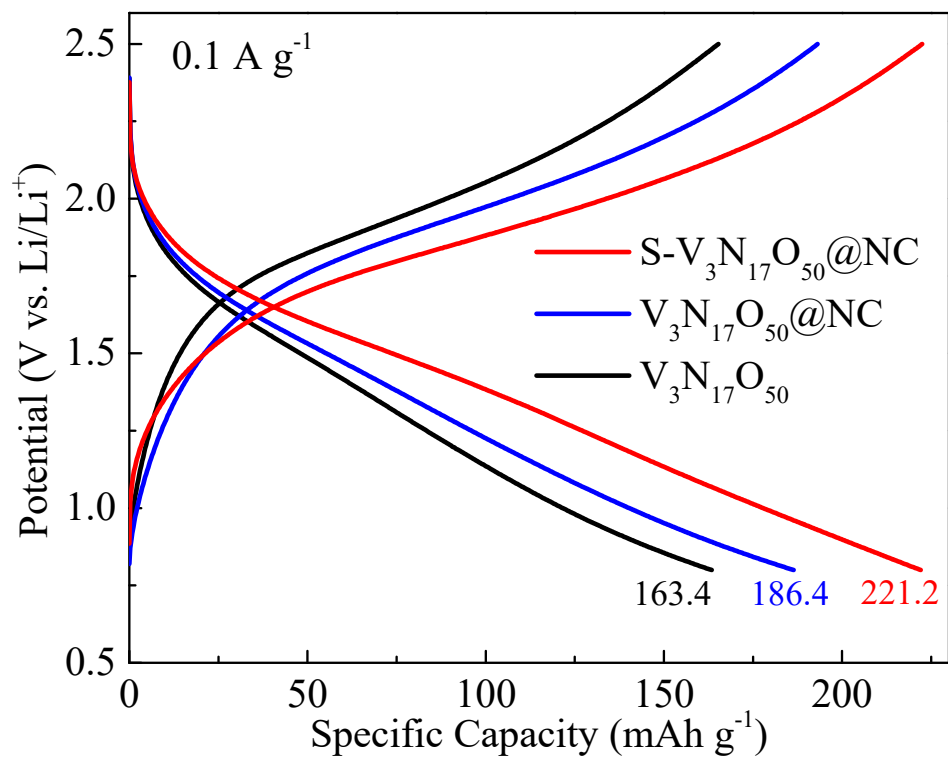

Fig. S15. GCD curves of V<sub>3</sub>Nb<sub>17</sub>O<sub>50</sub>, V<sub>3</sub>Nb<sub>17</sub>O<sub>50</sub>@NC and S-V<sub>3</sub>Nb<sub>17</sub>O<sub>50</sub>@NC at 0.1 A g<sup>-1</sup>.

GCD curves and time-capacity curves of  $V_3Nb_{17}O_{50}$ ,  $V_3Nb_{17}O_{50}@NC$ , and  $S-V_3Nb_{17}O_{50}@NC$  were tested at  $5\text{ A g}^{-1}$  current density (Fig. S16). Specifically, the reversible specific capacity of  $V_3Nb_{17}O_{50}$ ,  $V_3Nb_{17}O_{50}@NC$ , and  $S-V_3Nb_{17}O_{50}@NC$  are  $38.7\text{ mAh g}^{-1}$ ,  $51.2\text{ mAh g}^{-1}$ , and  $84.8\text{ mAh g}^{-1}$ , respectively. Meanwhile, when the reversible specific capacity reaches  $38.7\text{ mAh g}^{-1}$ , the charging time required for  $V_3Nb_{17}O_{50}$ ,  $V_3Nb_{17}O_{50}@NC$  and  $S-V_3Nb_{17}O_{50}@NC$  is  $30.02\text{ s}$ ,  $27.98\text{ s}$  and  $25.73\text{ s}$ , individually, indicating that the N, S co-doping enhances the conductivity and provides more active sites to increase capacitance performance.<sup>1,2,3</sup>

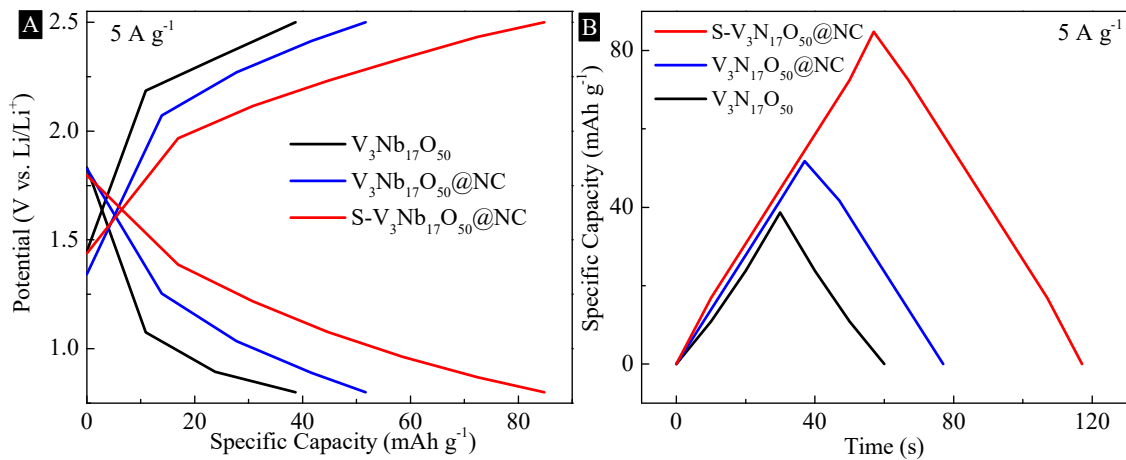

Fig. S16. GCD curves and time-capacity curves at  $5\text{ A g}^{-1}$ .

To further illustrate the carbon layer effect, the GCD curves of initial three cycles for  $V_3Nb_{17}O_{50}$  and  $S-V_3Nb_{17}O_{50}@NC$  are supplemented (Fig. S17). In detail, the first charge/discharge cycle of  $V_3Nb_{17}O_{50}$  delivers specific capacity of  $176.3/220.6\text{ mAh g}^{-1}$  with a low initial cycle Coulombic efficiency (79.9%). Relatively,  $S-V_3Nb_{17}O_{50}@NC$  shows high specific capacity ( $228.8/235.7\text{ mAh g}^{-1}$ ) and initial Coulombic efficiency (97.1%), verifying the improved  $Li^+$  transport efficiency. Specifically, the retention of  $Li^+$  in the  $V_3Nb_{17}O_{50}$  lattice and SEI layer formation leads to lattice blockage, thus lowering  $V_3Nb_{17}O_{50}$  specific capacity.<sup>4</sup> Meanwhile, the amorphous carbon layer, as a SEI layer to some extent, can provide more  $Li^+$  transport channels, lessen excessive  $Li^+$  entering  $V_3Nb_{17}O_{50}$  lattice, and boost the  $Li^+$  transport uniformity and stability.<sup>5,6,7</sup>

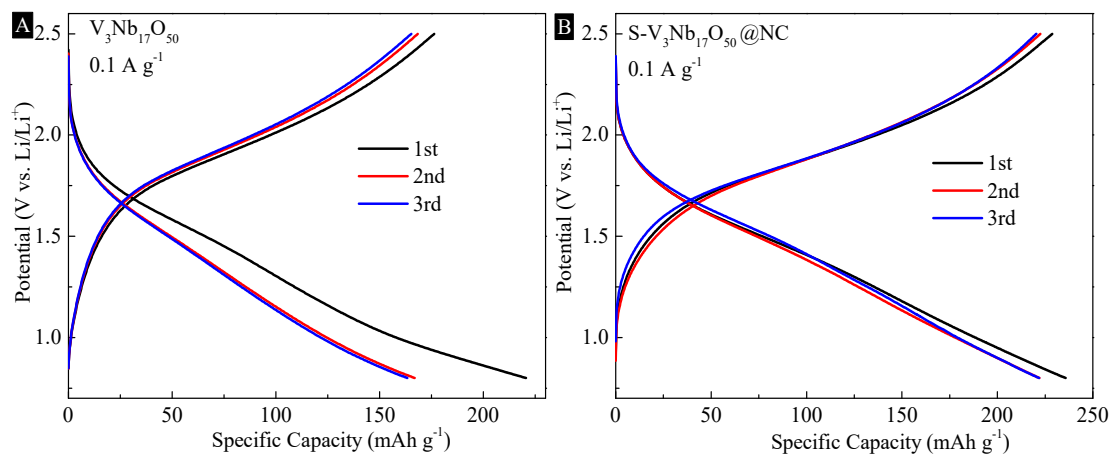

Fig. S17 GCD curves of  $V_3Nb_{17}O_{50}$  (A) and  $S-V_3Nb_{17}O_{50}@NC$  (B) at  $0.1 \text{ A g}^{-1}$ .

Table. S2. Theoretical capacity of bimetallic niobium oxide

| Sample              | Theoretical capacity ( $\text{mAh g}^{-1}$ ) | References |
|---------------------|----------------------------------------------|------------|
| This work           | 423                                          |            |
| $TiNb_2O_7$         | 387                                          | 8          |
| $Ti_2Nb_{10}O_{29}$ | 396                                          | 9          |
| $FeNb_{11}O_{29}$   | 400                                          | 10         |
| $CrNb_{11}O_{29}$   | 401                                          | 11         |
| $AlNb_{11}O_{29}$   | 390                                          | 12         |
| $GaNb_{11}O_{29}$   | 379                                          | 13         |
| $Mg_2Nb_{34}O_{87}$ | 396                                          | 14         |
| $Zn_2Nb_{34}O_{87}$ | 389                                          | 15         |
| $Cu_2Nb_{34}O_{87}$ | 401                                          | 16         |
| $AgNb_{13}O_{33}$   | 377.9                                        | 17         |
| $MoNb_{12}O_{33}$   | 401                                          | 18         |
| $ZrNb_{14}O_{37}$   | 378.3                                        | 19         |
| $HfNb_{24}O_{62}$   | 378                                          | 20         |



## References:

- 1 X. Li, X. Hu, L. Zhou, R. Wen, X. Xu, S. Chou, L. Chen, A.-M. Cao and S. Dou, *J. Mater. Chem. A*, 2019, **7**, 11976–11984.
- 2 Z. Lu, Y. Zhai, N. Wang, Y. Zhang, P. Xue, M. Guo, B. Tang, D. Huang, W. Wang, Z. Bai and S. Dou, *Chem. Eng. J.*, 2020, **380**, 122455.
- 3 W. Gou, X. Kong, Y. Wang, Y. Ai, S. Liang, A. Pan and G. Cao, *Chem. Eng. J.*, 2019, **374**, 545–553.
- 4 Q. Fu, X. Zhu, R. Li, G. Liang, L. Luo, Y. Chen, Y. Ding, C. Lin, K. Wang and X. S. Zhao, *Energy Storage Mater.*, 2020, **30**, 401–411.
- 5 L. Chen, J. Zhang, R. Tong, J. Zhang, H. Wang, G. Shao and C. Wang, *Small*, 2022, **18**, 2106142.
- 6 Y. Lian, Y. Zheng, D. Wang, Y. Bai, H. Yan, Z. Wang, J. Zhao and H. Zhang, *J. Colloid Interface Sci.*, 2022, **606**, 77–86.
- 7 H.-S. Lim, Y.-K. Sun and K.-D. Suh, *J. Mater. Chem. A*, 2013, **1**, 10107.
- 8 Y. Huang, X. Li, J. Luo, K. Wang, Q. Zhang, Y. Qiu, S. Sun, S. Liu, J. Han and Y. Huang, *ACS Appl. Mater. Interfaces*, 2017, **9**, 8696–8703.
- 9 J. Zeng, L. Yang, R. Shao, L. Zhou, W. Utetiwabo, S. Wang, R. Chen and W. Yang, *J. Colloid Interface Sci.*, 2021, **600**, 111–117.
- 10 R. Zheng, S. Qian, X. Cheng, H. Yu, N. Peng, T. Liu, J. Zhang, M. Xia, H. Zhu and J. Shu, *Nano Energy*, 2019, **58**, 399–409.
- 11 Q. Fu, X. Liu, J. Hou, Y. Pu, C. Lin, L. Yang, X. Zhu, L. Hu, S. Lin, L. Luo and Y. Chen, *J. Power Sources*, 2018, **397**, 231–239.
- 12 X. Lou, R. Li, X. Zhu, L. Luo, Y. Chen, C. Lin, H. Li and X. S. Zhao, *ACS Appl. Mater. Interfaces*, 2019, **11**, 6089–6096.
- 13 X. Lou, Q. Fu, J. Xu, X. Liu, C. Lin, J. Han, Y. Luo, Y. Chen, X. Fan and J. Li, *ACS Appl. Nano Mater.*, 2018, **1**, 183–190.
- 14 X. Zhu, Q. Fu, L. Tang, C. Lin, J. Xu, G. Liang, R. Li, L. Luo and Y. Chen, *ACS Appl. Mater. Interfaces*, 2018, **10**, 23711–23720.
- 15 X. Zhu, H. Cao, R. Li, Q. Fu, G. Liang, Y. Chen, L. Luo, C. Lin and X. S. Zhao, *J. Mater. Chem. A*, 2019, **7**, 25537–25547.
- 16 X. Cai, H. Yan, Z. Yang, J. Zhang, H. Yu, L. Zhang and J. Shu, *Ceram. Int.*, 2021, **47**, 24511–24518.
- 17 Z. Chen, X. Cheng, W. Ye, R. Zheng, H. Zhu, H. Yu, N. Long, M. Shui and J. Shu, *Chem. Eng. J.*, 2019, **366**, 246–253.
- 18 X. Zhu, J. Xu, Y. Luo, Q. Fu, G. Liang, L. Luo, Y. Chen, C. Lin and X. S. Zhao, *J. Mater. Chem. A*, 2019, **7**, 6522–6532.
- 19 Y. Li, R. Zheng, H. Yu, X. Cheng, T. Liu, N. Peng, J. Zhang, M. Shui and J. Shu, *ACS Appl. Mater. Interfaces*, 2019, **11**, 22429–22438.
- 20 Q. Fu, H. Cao, G. Liang, L. Luo, Y. Chen, V. Murugadoss, S. Wu, T. Ding, C. Lin and Z. Guo, *Chem. Commun.*, 2020, **56**, 619–622.
